# Supplementary material for: Partially oxidised boron nitride as a 2D nanomaterial for nanofiltration applications
Source: Royal Society of Chemistry journal article supplement (doi:10.1039/d2na00472k), 2022-01-01
Supplement: d2na00472k1.pdf [file d2na00472k1.pdf]

## Partially oxidised boron nitride as a 2D nanomaterial for nanofiltration applications

Natalia García Doménech, Áine Coogan, Finn Purcell-Milton, María Luisa Casasín, Adrián Sanz Arjona, Marc Brunet Cabré, Aran Rafferty, Kim McKelvey, Peter Dunne and Yurii K. Gun'ko

Table S1: Concentration and absorbance on the maximum of absorbance of the dyes.

| Dye            | Concentration ( $\mu\text{M}$ ) | Max. Abs (nm) | Absorbance (a.u) |
|----------------|---------------------------------|---------------|------------------|
| Evans Blue     | 15                              | 600           | 1                |
| Methylene Blue | 27                              | 663           | 1.5              |
| Methyl Orange  | 50                              | 445           | 1.2              |

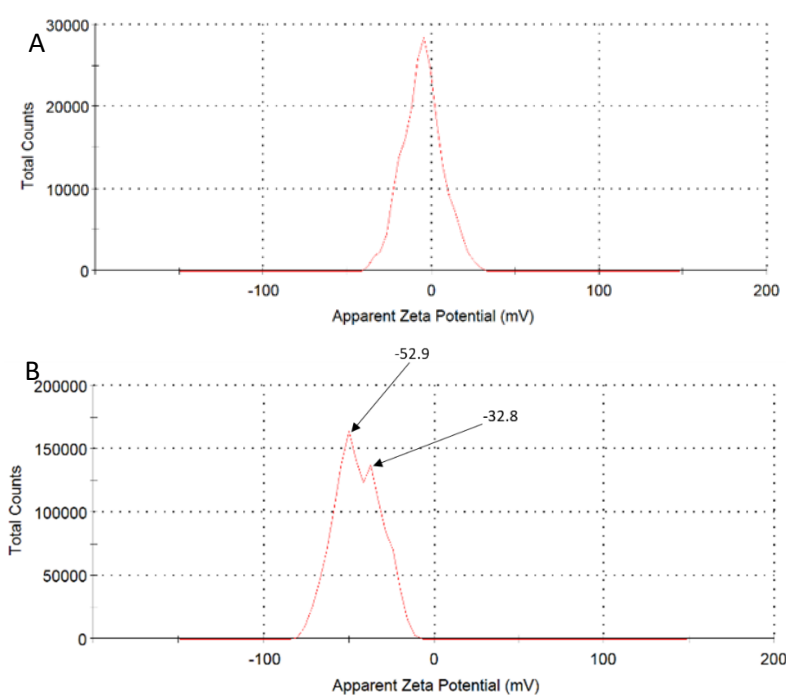

Fig. S1: Zeta potential measurements of A) BN and B) BNOx.

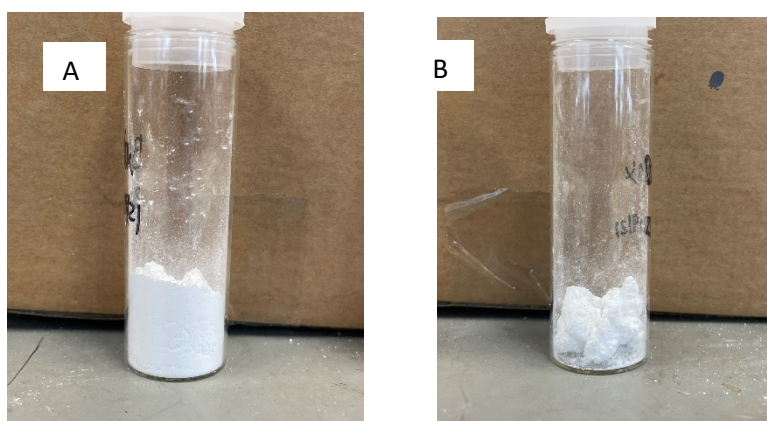

Fig. S2: BNOx out of the furnace as A) powder and B) “rocks”.

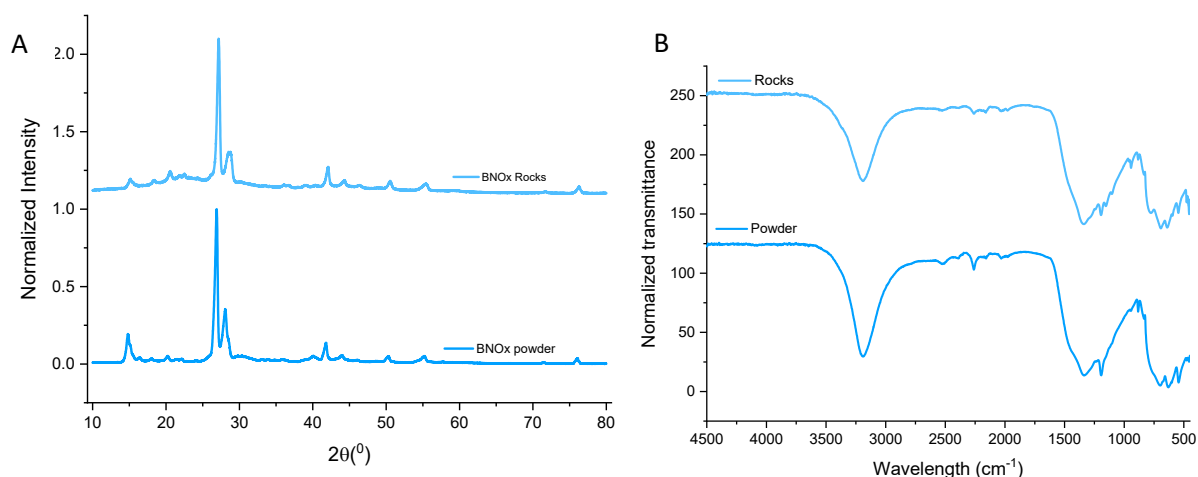

Fig. S3: A) PXRD patterns of BNOx powder and BNOx rocks and B) FTIR of BNOx powder and BNOx rocks.

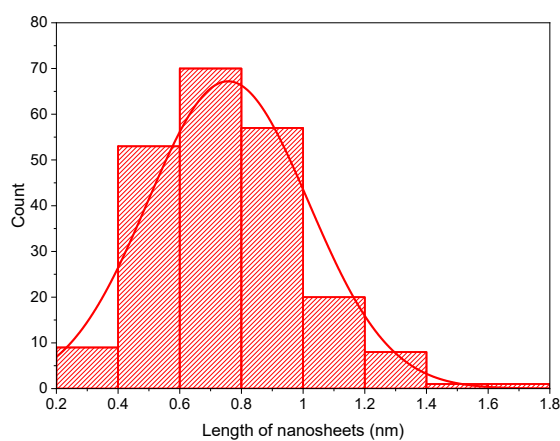

Fig. S4: size distribution of BNOx nanosheets after exfoliation.

Table S2: Main features of bulk BN and BNOx and exfoliated BNOx in Raman spectra.

| Sample          | Peak shifht ( $\text{cm}^{-1}$ ) | Intensity (a.u) | FWHM ( $\text{cm}^{-1}$ ) |
|-----------------|----------------------------------|-----------------|---------------------------|
| Bulk BN         | 1367                             | 32077           | 9.32                      |
| Bulk BNOx       | 1367                             | 40160           | 11.72                     |
| Exfoliated BNOx | 1367                             | 13710           | 15.3                      |

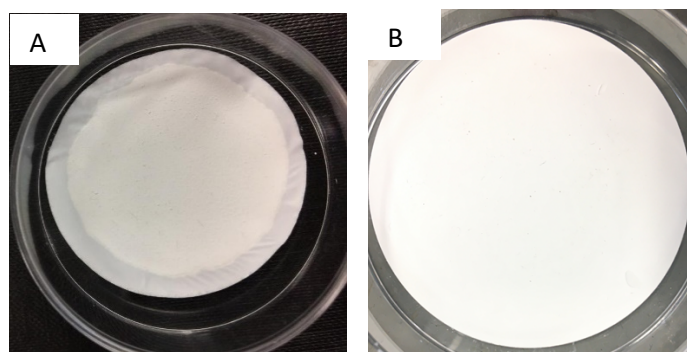

Fig. S5: Photos of A) BN and B) BNOx membranes.

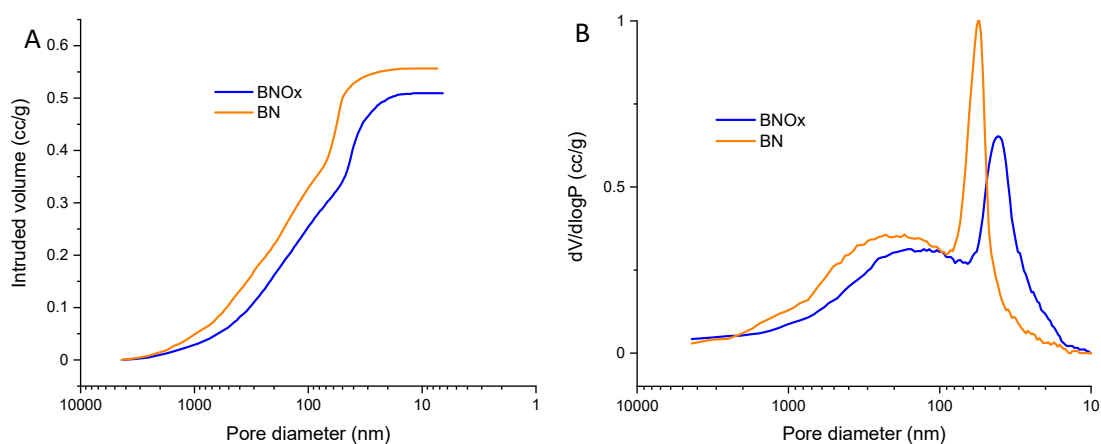

Fig. S6 A) Comparison of mercury intrusion characteristics of the BN and BNOx membrane samples and B) comparison of mercury pore size distribution of the BN and BNOx samples.

Table S3: Summary of BET surface area analysis data.

| Sample | Surface area ( $\text{m}^2/\text{g}$ ) | BJH desorption pore diameter (nm) | BJH desorption pore volume ( $\text{cm}^3/\text{g}$ ) |
|--------|----------------------------------------|-----------------------------------|-------------------------------------------------------|
| BN     | 26.7                                   | 3.5                               | 0.089                                                 |
| BNOx   | 27.3                                   | 22.6                              | 0.141                                                 |

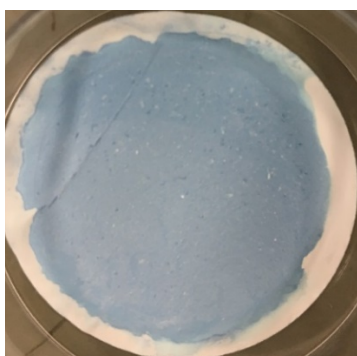

Fig. S7: BNOx membrane after Evans Blue filtration.

Table S4: Summary of data for the retention of Evans Blue of the membranes obtained with BNOx. The values were calculated using Origin 2018.

|            | N total | Mean | Standard Deviation | Minimum | Median | Maximum |
|------------|---------|------|--------------------|---------|--------|---------|
| Evans Blue | 18      | 99   | 1                  | 97      | 99     | 100     |

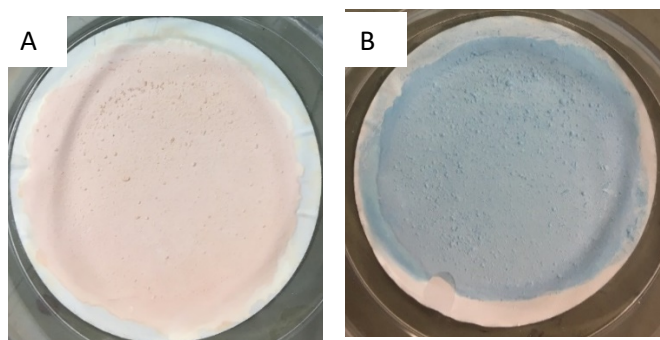

Fig. S8: BNOx membrane after A) Methyl Orange filtration and B) BNOx membrane after Methylene Blue filtration.

Table S5: Statistics from the retention of Methyl Orange and the Methylene Blue of the membranes obtained with BNOx. The values were calculated using Origin 2018.

|                | N total | Mean | Standard Deviation | Minimum | Median | Maximum |
|----------------|---------|------|--------------------|---------|--------|---------|
| Methyl Orange  | 10      | 99   | 0.3                | 99      | 100    | 100     |
| Methylene Blue | 10      | 100  | 0.2                | 99      | 100    | 100     |
